# Supplementary material for: Predicting the functional outcome of intensive inpatient rehabilitation after stroke: results from the RIPS Study
Source: PubMed Central journal article supplement — Eur J Phys Rehabil Med. 2023 Nov 7;60(1):1–12. doi: 10.23736/S1973-9087.23.07852-8 (PMC10938041; doi:10.23736/s1973-9087.23.07852-8), 2023-11-07
Supplement: Supplementary_Digital_Material1.pdf [file Supplementary_Digital_Material1.pdf]

SUPPLEMENTARY DIGITAL MATERIAL 1

Supplementary Table I.—Supplementary material, evaluation tools references.

| <i>Domain</i>                 | <i>Evaluation tool</i>                                                        | <i>Acronym</i> | <i>References</i>                                                                                                                                                                                                                                                                                           |
|-------------------------------|-------------------------------------------------------------------------------|----------------|-------------------------------------------------------------------------------------------------------------------------------------------------------------------------------------------------------------------------------------------------------------------------------------------------------------|
| <i>Clinical features</i>      | Markers of complexity                                                         | /              | Banchero A, Baratto L, Bellelli G, Bellia C, Bernardini B, Bressi M, et al. IPER2: Indicatori di processo e di Esito in Riabilitazione. :76.                                                                                                                                                                |
|                               | Cumulative Illness Rating Scale                                               | CIRS           | Linn BS, Linn MW, Gurel L. CUMULATIVE ILLNESS RATING SCALE. Journal of the American Geriatrics Society. May 1968;16(5):622–6.                                                                                                                                                                               |
|                               | National Institutes of Health Stroke Scale                                    | NIHSS          | Goldstein LB, Samsa GP. Reliability of the National Institutes of Health Stroke Scale: Extension to Non-Neurologists in the Context of a Clinical Trial. Stroke. February 1997;28(2):307–10.                                                                                                                |
|                               | Scale of disability in communication                                          | SDC            | Scale of disability in communication Meinecke C, Cappadonia C, Bernardini B. Validazione di una semplice scala di impairment comunicativo nell’anziano. In: XXIII Congresso Nazionale SIMFER Valutazione e qualità dell’assistenza in Medicina Riabilitativa. Ancona; 1995. p. 56–7.                        |
| <i>Psycho-social features</i> | Montreal Cognitive Assessment                                                 | MoCA           | Santangelo G, Siciliano M, Pedone R, Vitale C, Falco F, Bisogno R, et al. Normative data for the Montreal Cognitive Assessment in an Italian population sample. Neurol Sci. April 2015;36(4):585–91.                                                                                                        |
|                               | Oxford Cognitive Screening                                                    | OCS            | The Italian OCS Group, Mancuso M, Varalta V, Sardella L, Capitani D, Zoccolotti P, et al. Italian normative data for a stroke specific cognitive screening tool: the Oxford Cognitive Screen (OCS). Neurol Sci. October 2016;37(10):1713–21.                                                                |
|                               | Activity of Daily Living disabilities: Frenchay Activity Index                | FAI            | Monteiro M, Maso I, Sasaki AC, Barreto Neto N, Oliveira Filho J, Pinto EB. Validation of the Frenchay activity index on stroke victims. Arq Neuro-Psiquiatr. March 2017;75(3):167–71                                                                                                                        |
|                               | Activity of Daily Living disabilities: modified Functional Walking Categories | mFWC           | Perry J, Garrett M, Gronley JK, Mulroy SJ. Classification of Walking Handicap in the Stroke Population. Stroke. June 1995;26(6):982–9.                                                                                                                                                                      |
| <i>Functional profile</i>     | Modified Barthel Index                                                        | mBI            | Shah S, Vanclay F, Cooper B. Improving the sensitivity of the Barthel Index for stroke rehabilitation. Journal of Clinical Epidemiology. January 1989;42(8):703–9.                                                                                                                                          |
|                               | Trunk Control Test                                                            | TCT            | Franchignoni FP, Tesio L, Ricupero C, Martino MT. Trunk Control Test as an Early Predictor of Stroke Rehabilitation Outcome. Stroke. July 1997;28(7):1382–5.                                                                                                                                                |
|                               | Functional Ambulation Categories                                              | FAC            | Geyh S, Kurt T, Brockow T, Cieza A, Ewert T, Omar Z, et al. Identifying the concepts contained in outcome measures of clinical trials on stroke using the international classification of functioning, disability and health as a reference. Journal of Rehabilitation Medicine. 1 August 2004;36(0):56–62. |

|  |                                    |      |                                                                                                                                                                                                                                                                                                              |
|--|------------------------------------|------|--------------------------------------------------------------------------------------------------------------------------------------------------------------------------------------------------------------------------------------------------------------------------------------------------------------|
|  | Modified Rankin scale              | mRS  | Quinn TJ, Dawson J, Walters MR, Lees KR. Exploring the Reliability of the Modified Rankin Scale. Stroke. March 2009;40(3):762–6.                                                                                                                                                                             |
|  | Short Physical Performance Battery | SPPB | Guralnik JM, Simonsick EM, Ferrucci L, Glynn RJ, Berkman LF, Blazer DG, et al. A Short Physical Performance Battery Assessing Lower Extremity Function: Association With Self-Reported Disability and Prediction of Mortality and Nursing Home Admission. Journal of Gerontology. 1 March 1994;49(2):M85–94. |
|  | Modified Ashworth Scale            | MAS  | Bohanon RW, Smith MB Interrater reliability of a modified Ashworth scale of muscle spasticity. Phys Ther 1987;67:206-7.                                                                                                                                                                                      |
|  | Fulg-Meyer Assessment scale        | FMA  | Cecchi F, Carrabba C, Bertolucci F, Castagnoli C, Falsini C, Gnetti B, et al. Transcultural translation and validation of Fugl–Meyer assessment to Italian. Disability and Rehabilitation. 1 May 2020;1–6.                                                                                                   |
