# Supplementary material for: Predicting the functional outcome of intensive inpatient rehabilitation after stroke: results from the RIPS Study
Source: PubMed Central journal article supplement — Eur J Phys Rehabil Med. 2023 Nov 7;60(1):1–12. doi: 10.23736/S1973-9087.23.07852-8 (PMC10938041; doi:10.23736/s1973-9087.23.07852-8), 2023-11-07
Supplement: Supplementary_Digital_Material2.pdf [file Supplementary_Digital_Material2.pdf]

# SUPPLEMENTARY DIGITAL MATERIAL 2

## Calculator

Insert values at admission:

|                                             |  |
|---------------------------------------------|--|
| Age (in years)                              |  |
| Gender (0, male - 1, female)                |  |
| Cohabitation (0, no - 1, yes)               |  |
| Time from event (in days)                   |  |
| Reduced vigilance and coma (1, yes - 2, no) |  |
| Clinical instability (1, yes - 2, no)       |  |
| Delirium (1, yes - 2, no)                   |  |
| Acute infection (1, yes - 2, no)            |  |
| Dysphagia (1, yes - 2, no)                  |  |
| Malnutrition (1, yes - 2, no)               |  |
| Bedsore (1, yes - 2, no)                    |  |
| Bladder catheter (1, yes - 2, no)           |  |
| Incontinence (1, yes - 2, no)               |  |
| Pain (1, yes - 2, no)                       |  |
| CIRS_comorbidity                            |  |
| NIHSS total score                           |  |
| Aphasia (NIHSS_9 item)                      |  |
| MoCA (adjusted score by Santangelo)         |  |
| mBI total score                             |  |
| TCT total score                             |  |
| mRS anamnestic score                        |  |
| MAS total score                             |  |
| FMA (total score)                           |  |

Estimated mBI total score at discharge: 45,268
